# Supplementary material for: Direct formation of Au(iii) acetyl, alkoxyl and alkynyl functionalities via halide free tricationic Au(iii) precursors
Source: Royal Society of Chemistry journal article supplement (doi:10.1039/c7dt04675h), 2018-01-01

Supporting information for:

Direct formation of Au(III) acetate, alkoxylato and alkynyl  
functionalities via halide free tricationic Au(III) precursors

**Robert Corbo, Neville B Hall and Jason L. Dutton\***

**Department of Chemistry and Physics, La Trobe Institute for Molecular Sciences**

**La Trobe University**

**Melbourne, Victoria, Australia**

**[j.dutton@latrobe.edu.au](mailto:j.dutton@latrobe.edu.au)**

$^1\text{H}$  NMR spectrum of compound **13** ( $\text{CD}_3\text{CN}$ ; 500 MHz)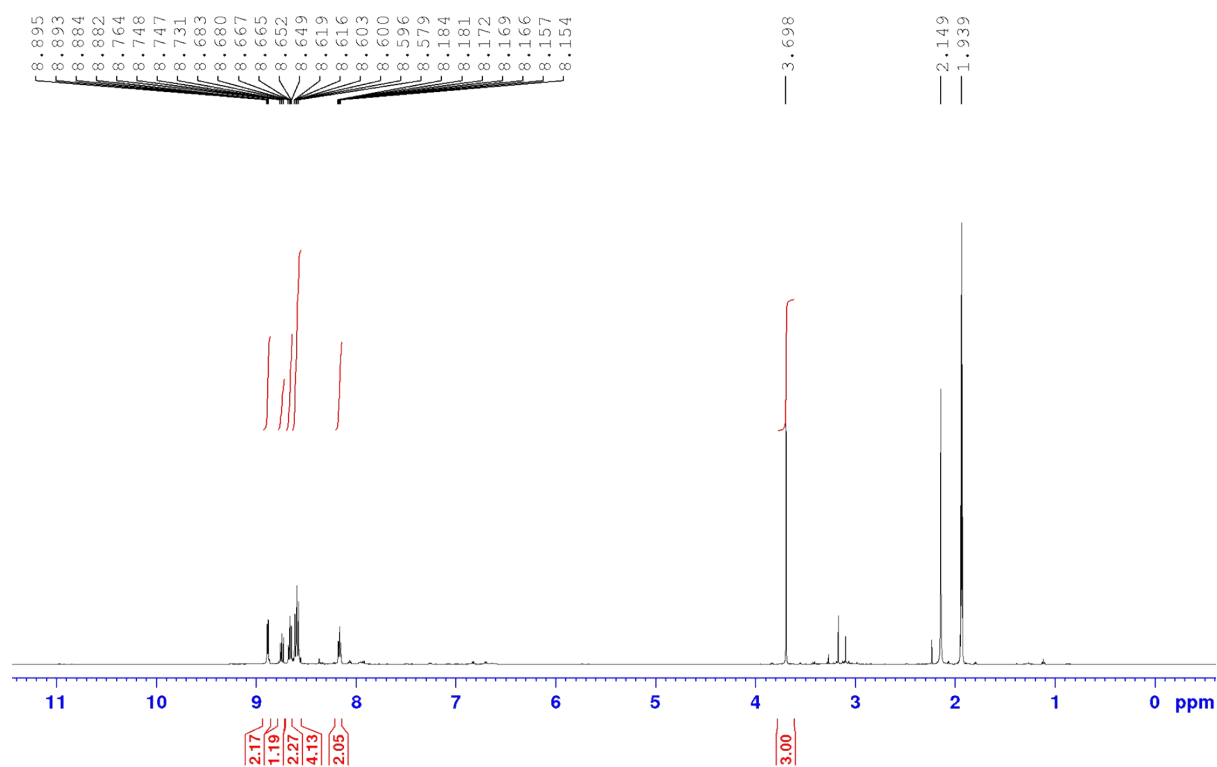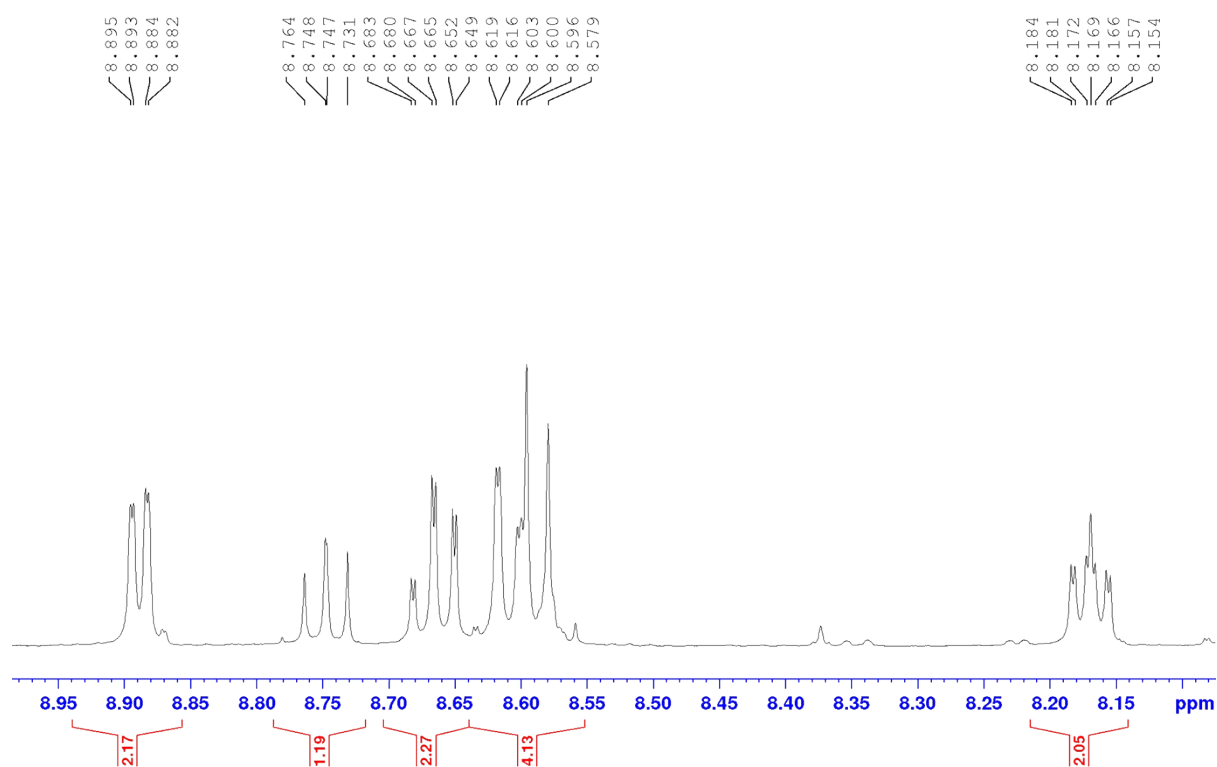

$^{13}\text{C}$  NMR spectrum of compound **13** ( $\text{CD}_3\text{CN}$ ; 125 MHz)

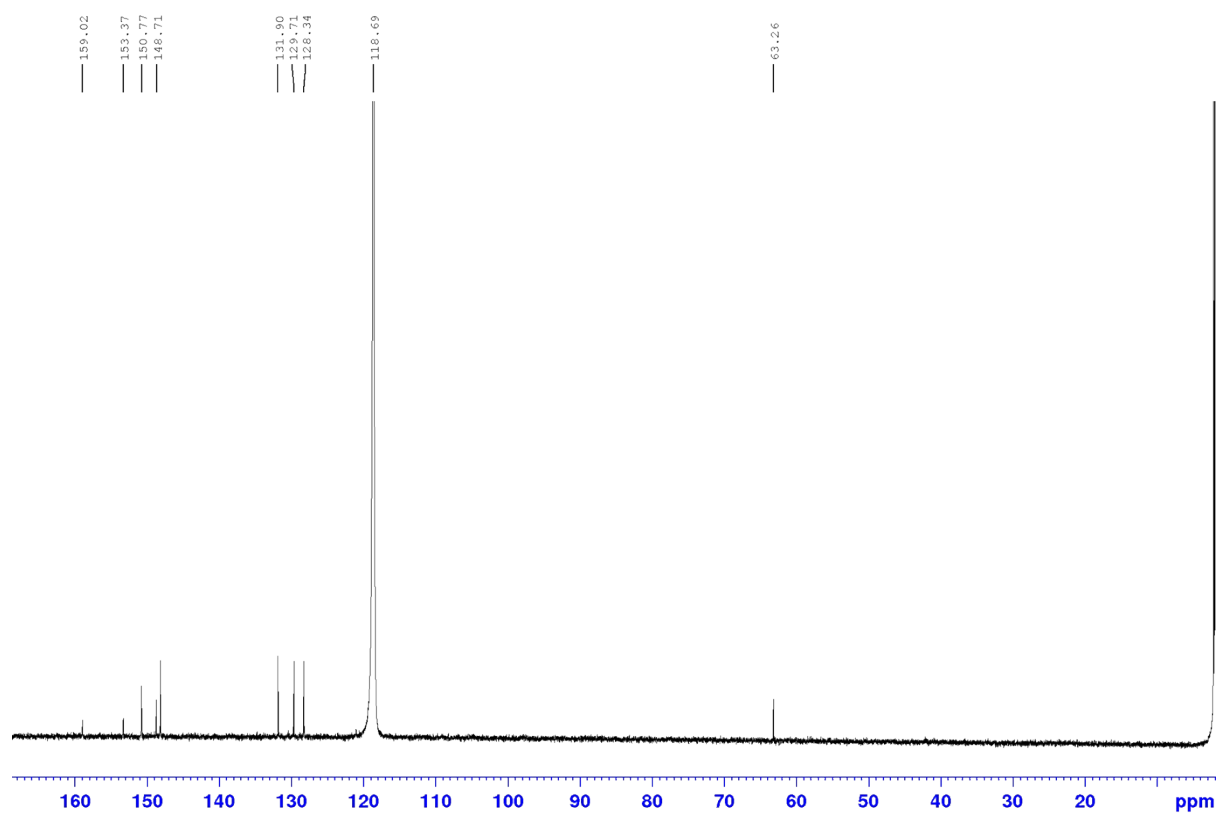

$^1\text{H}$  NMR spectrum showing the formation of compound **17** upon stirring of **13** in  $\text{D}_2\text{O}$  for 2 days ( $\text{D}_2\text{O}$ ; 500 MHz)

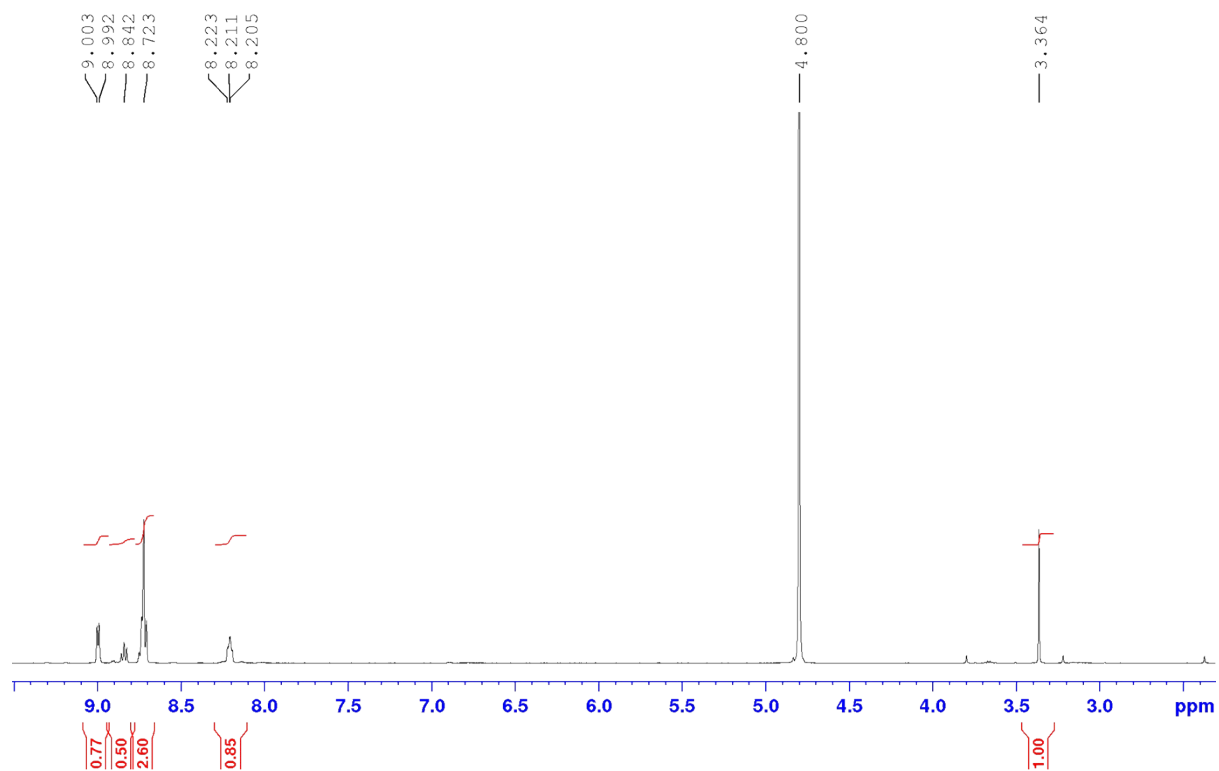

<sup>1</sup>H NMR spectrum of compound **14** (CD<sub>3</sub>CN; 500 MHz)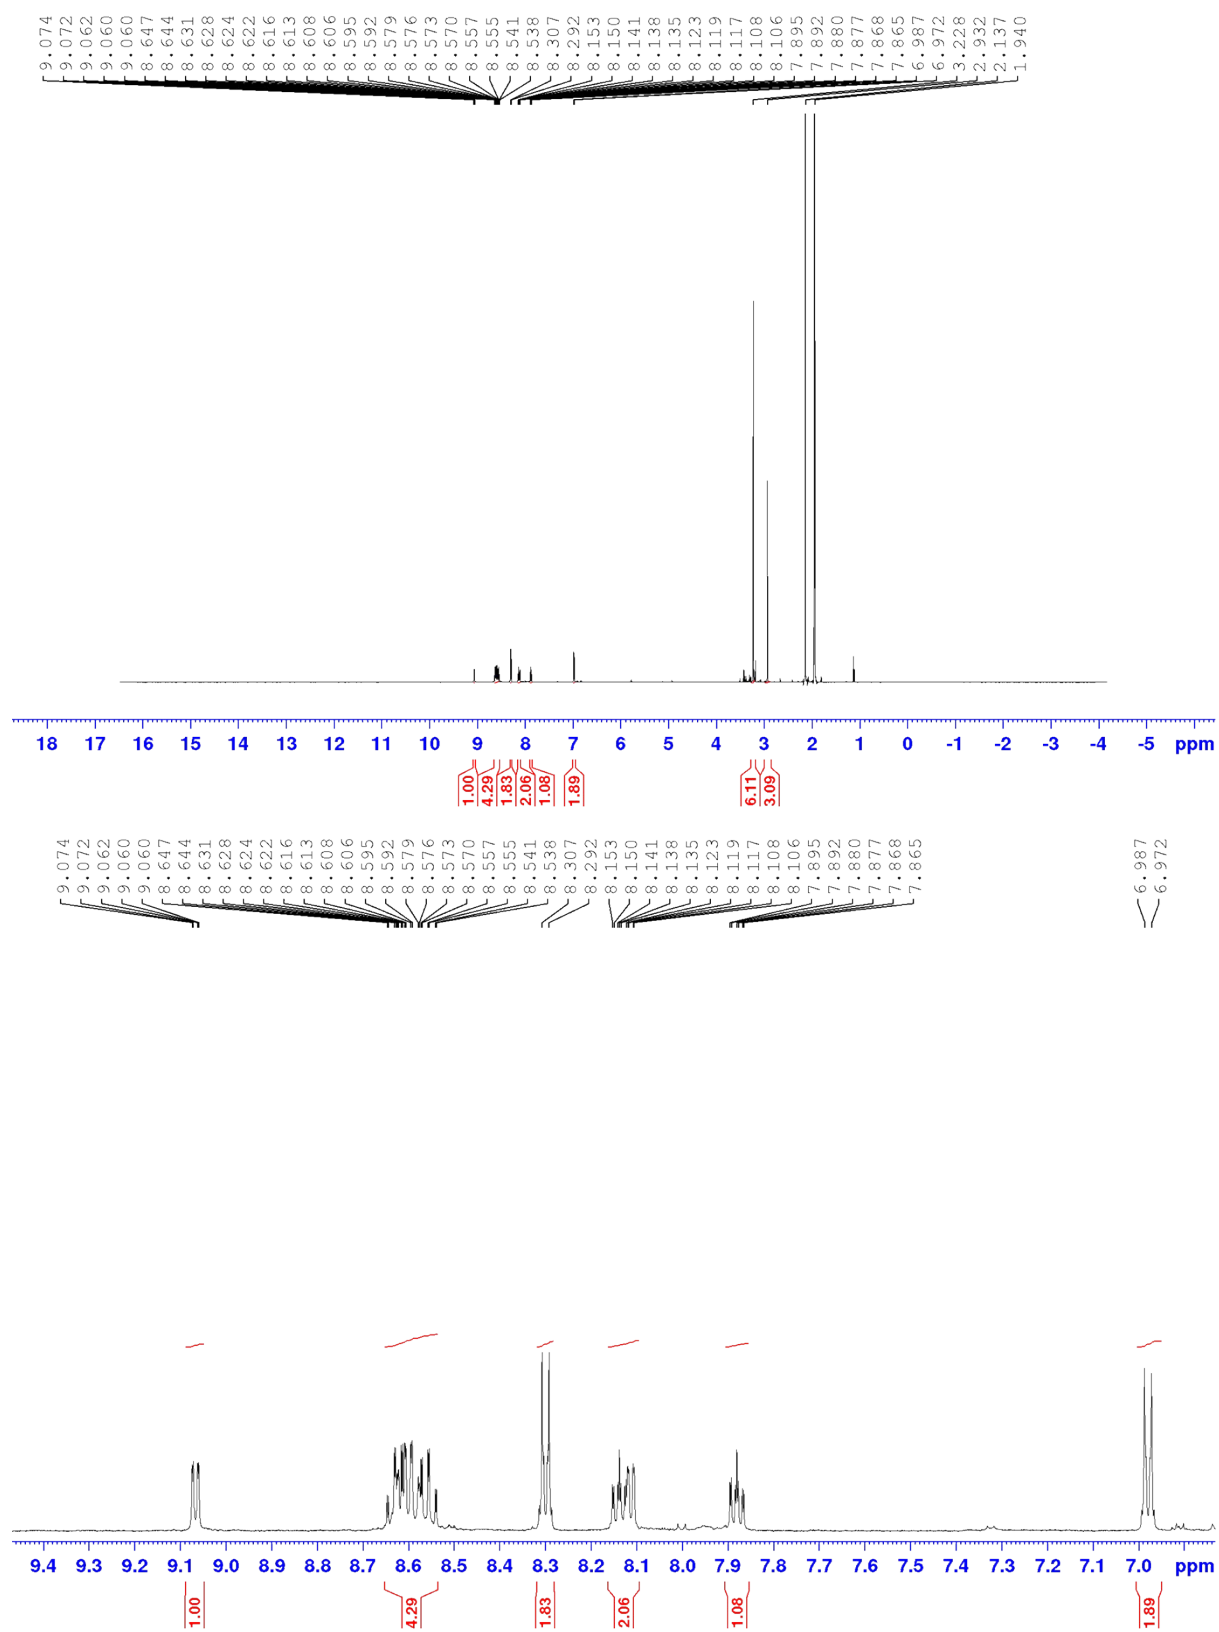

$^{13}\text{C}$  NMR spectrum of compound **14** ( $\text{CD}_3\text{CN}$ ; 125 MHz)

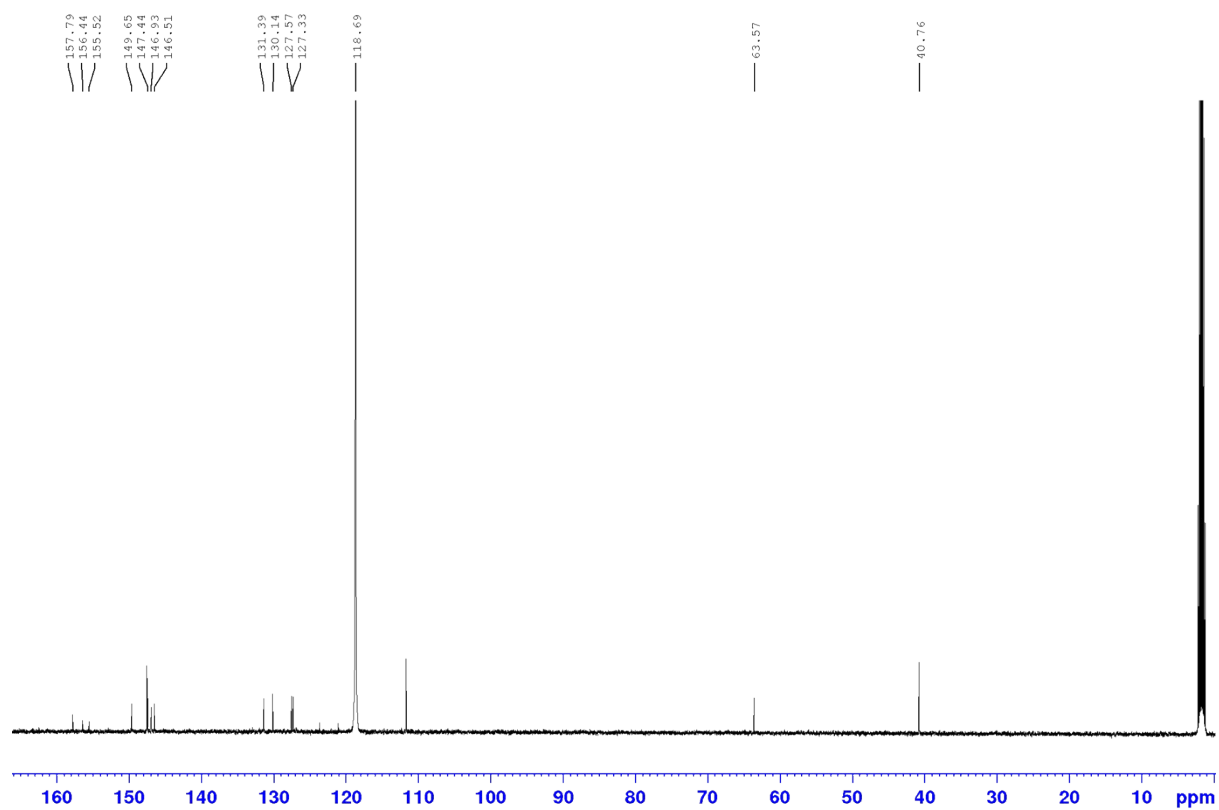

$^1\text{H}$  NMR spectrum showing conversion of compound **14** to **11** upon exposure of **14** to  $\text{H}_2\text{O}$  ( $\text{CD}_3\text{CN}$ ; 400 MHz)

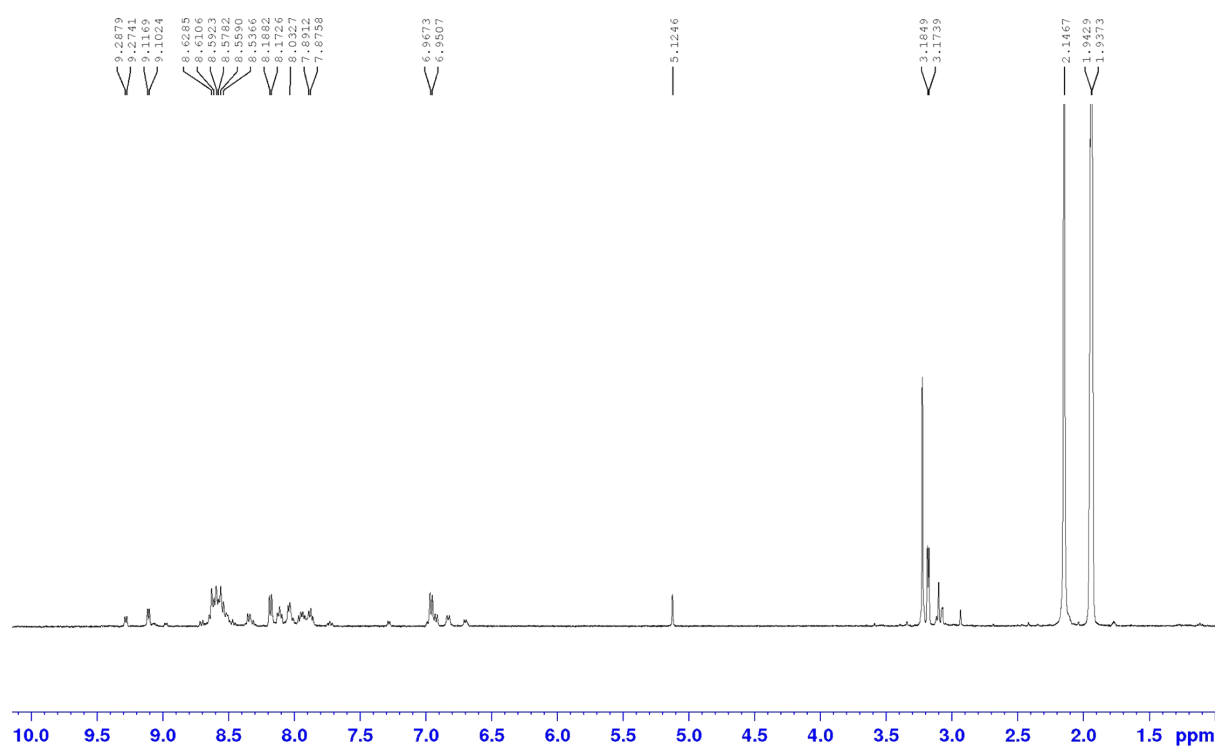

$^1\text{H}$  NMR spectrum of compound **20** ( $(\text{CD}_3)_2\text{CO}$ ; 400 MHz)

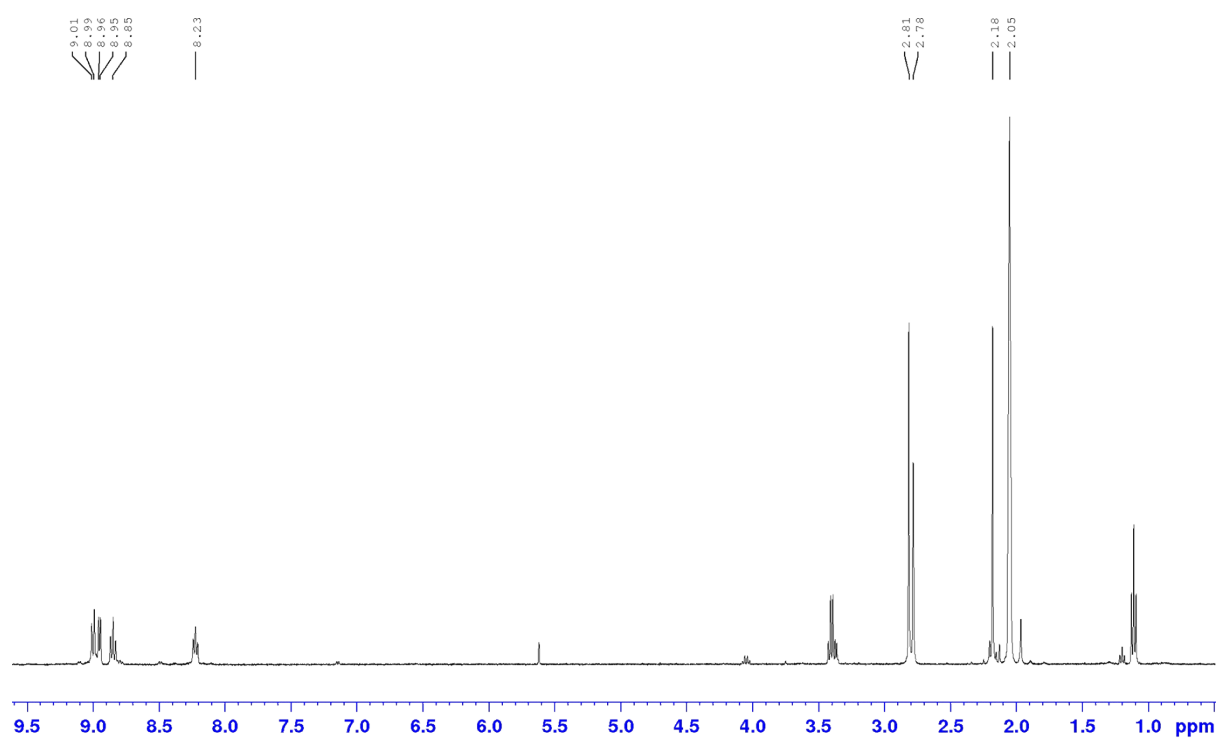



$^1\text{H}$  NMR spectrum of compound **21** ( $\text{CD}_3\text{CN}$ ; 500 MHz)

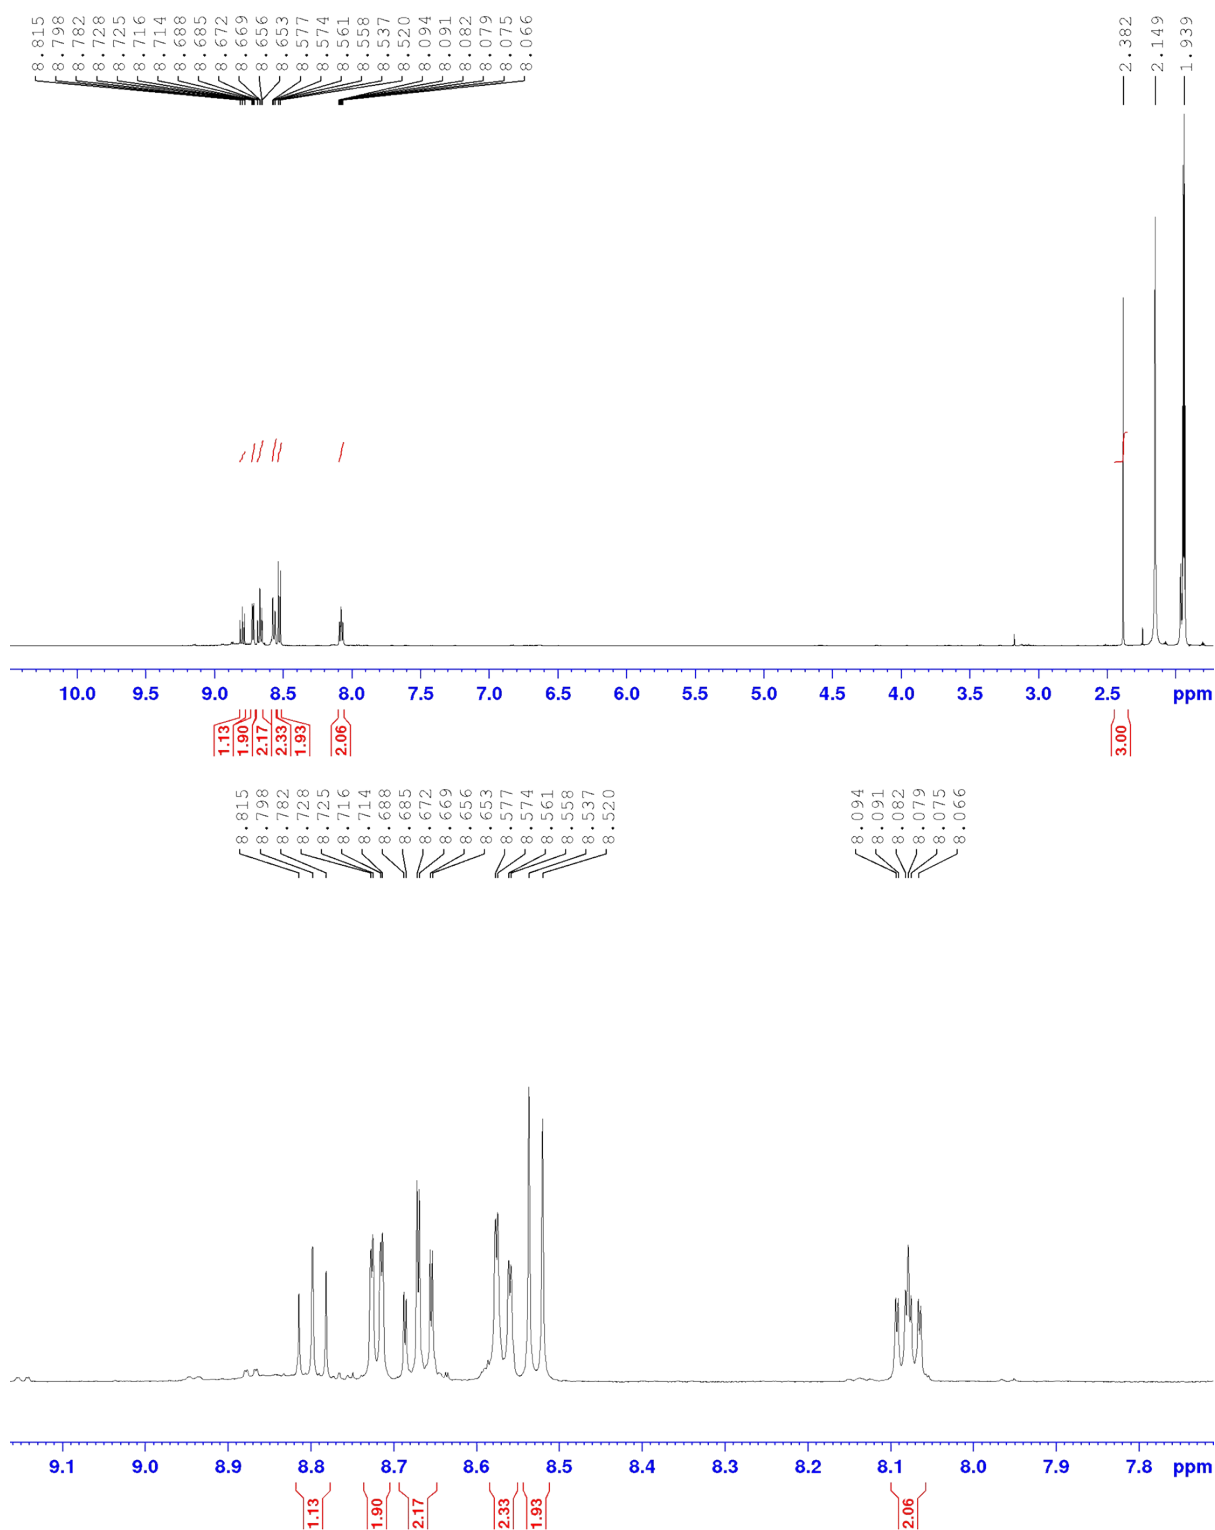

$^{13}\text{C}$  NMR spectrum of compound **21** ( $\text{CD}_3\text{CN}$ ; 125 MHz)

\*peak at 20.99 and 172.87 are assigned to residual acetic acid remaining in the purified sample.

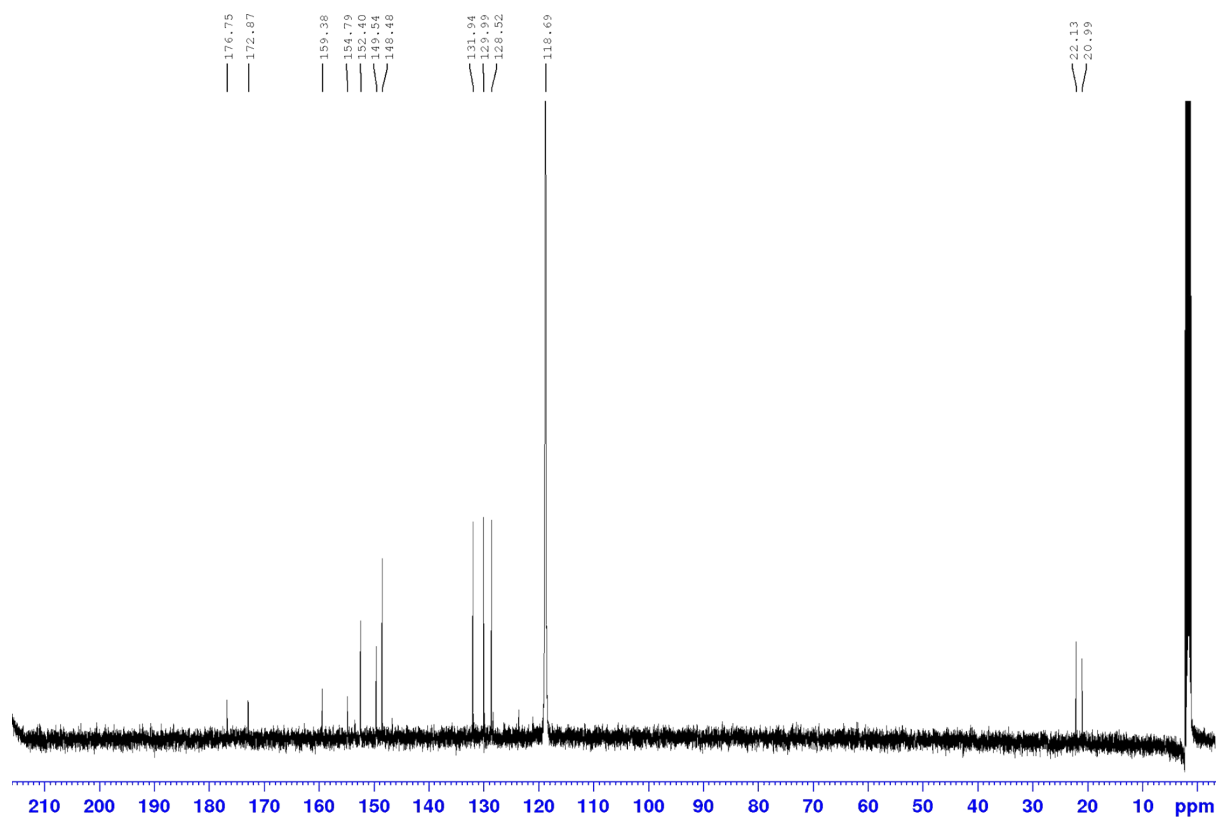

$^1\text{H}$  NMR spectrum showing the formation of compound **17** upon exposure of compound **21** to  $\text{H}_2\text{O}$  ( $\text{CD}_3\text{CN}$ ; 500 MHz)

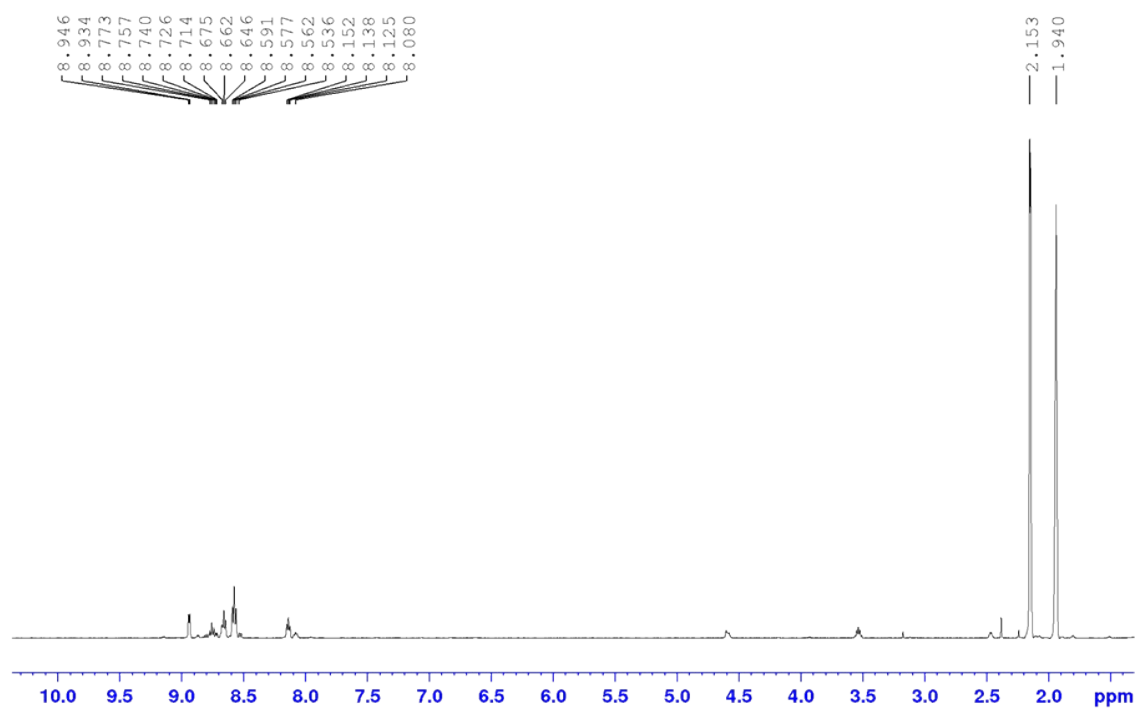

<sup>1</sup>H NMR spectrum of compound **22** (CD<sub>3</sub>CN; 500 MHz)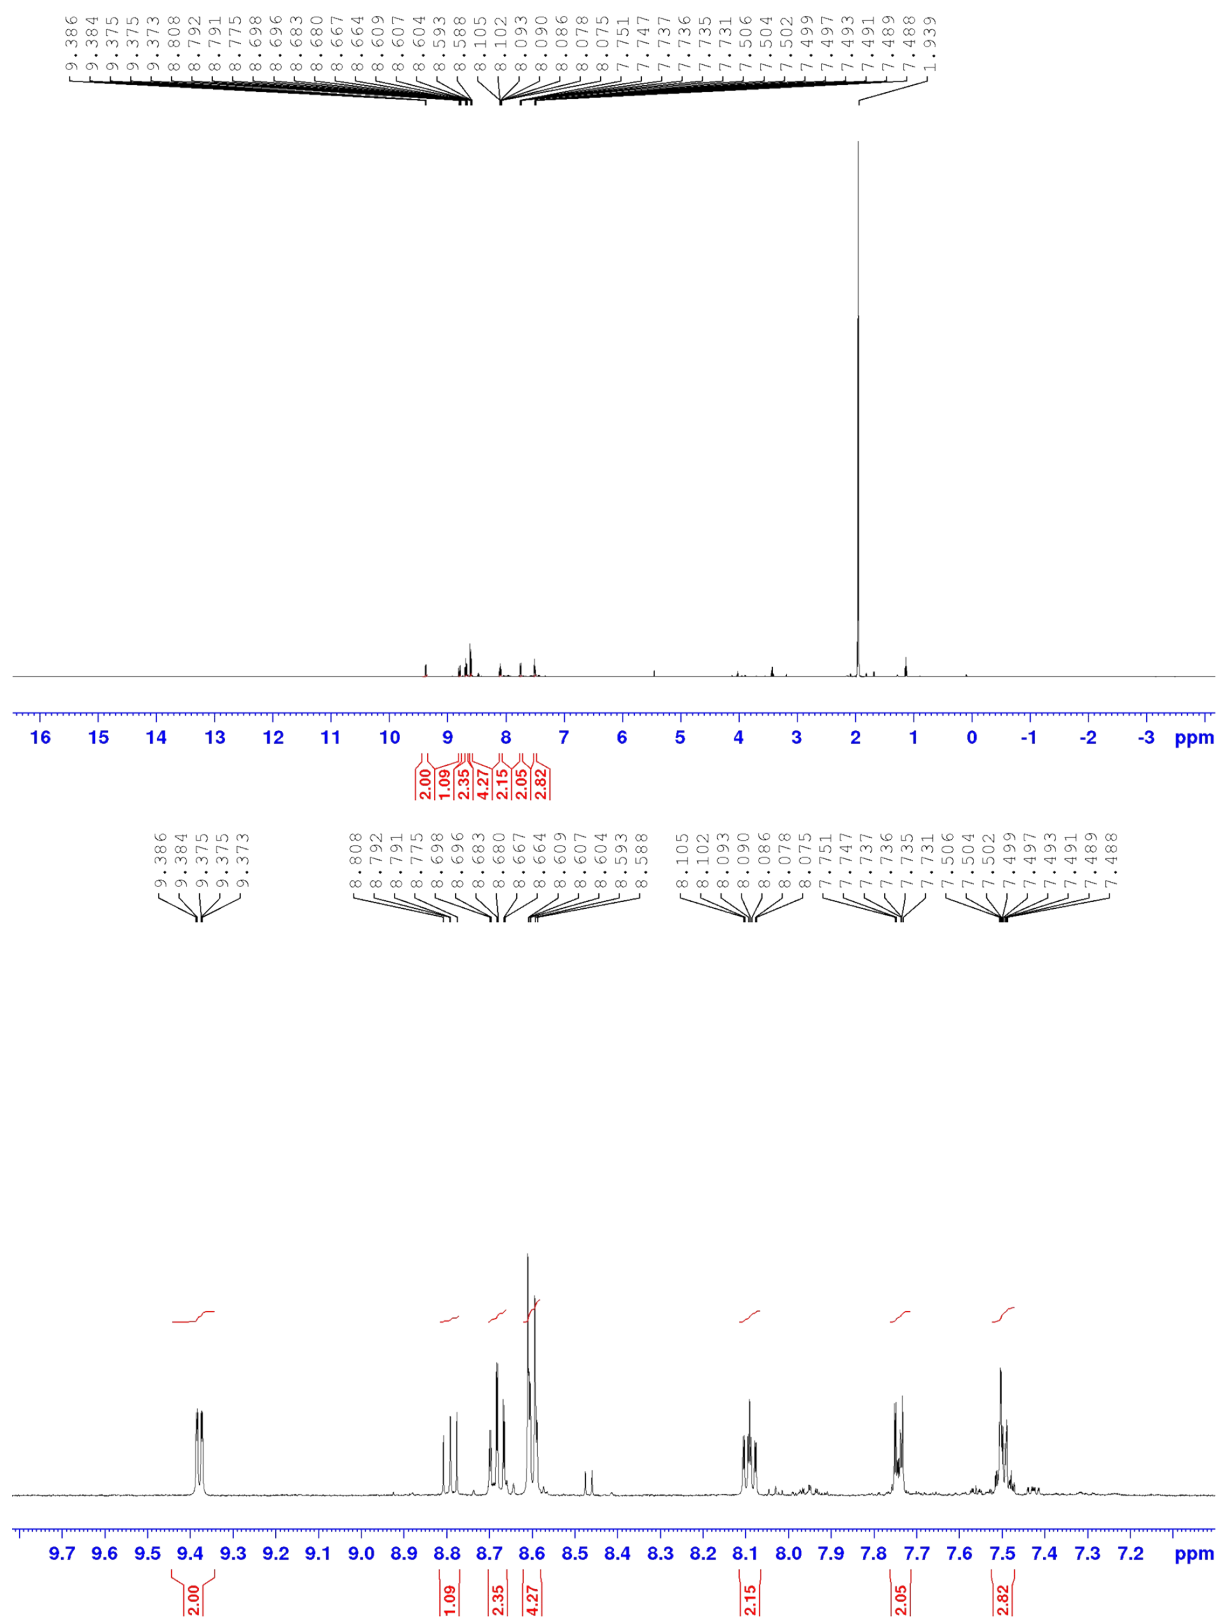

$^{13}\text{C}$  NMR spectrum of compound **22** ( $\text{CD}_3\text{CN}$ ; 125 MHz)

\*peak at 16.09 and 66.76 are assigned to residual  $\text{Et}_2\text{O}$  remaining in the purified sample due to workup .

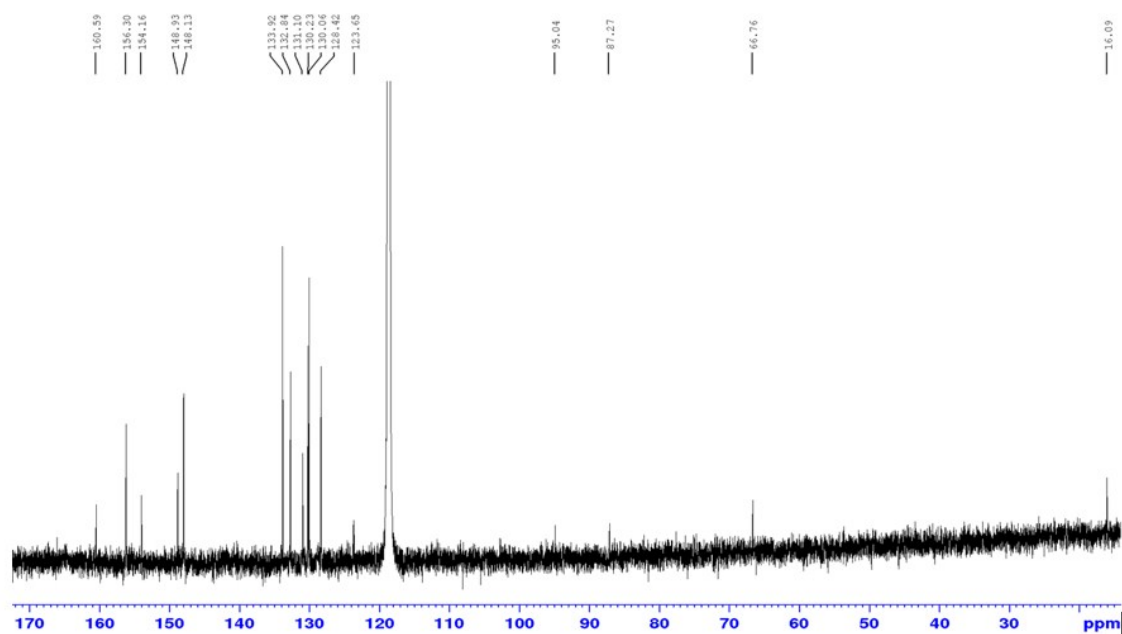

Supplement: c7dt04675h1.pdf [file c7dt04675h1.pdf]
